# Supplementary material for: Adaptation of Maize to Temperate Climates: Mid-Density Genome-Wide Association Genetics and Diversity Patterns Reveal Key Genomic Regions, with a Major Contribution of the Vgt2 (ZCN8) Locus
Source: PLOS journal article supplement (doi:10.1371/journal.pone.0071377), 2013-08-30

**Figure S12. Global representation along chromosomes of the most significant SNP-flowering time associations, meta QTL obtained by Chardon *et al.* [10], differentiation indexes  $F_{ST}$  and  $F_{STB}$ , overall diversity  $H_T$  and linkage disequilibrium pairwise measures.** The 10 chromosomes were ordered and depicted on 10 different pages. Centromere boundaries are indicated by two vertical grey dashed lines. Red vertical dashed lines with marker numbers starting by # indicate the positions of SNPs significantly associated with female flowering time (FFLW8) and/or under selection (described in Table 3). From the top to the bottom: the first Manhattan plot shows the position of SNPs displaying the most significant associations ( $P$ -value  $< 10^{-5}$ ) with female flowering time (FFLW8), male flowering time (MFLW8) and anthesis to silking intervals (ASI8) with the  $Q_{55SSRs} + K_{IBS(94SSRs)}$  model. Blue rectangles correspond to meta QTL of flowering time, as described in [10]. The second Manhattan plot recalls additional associations for female flowering time ( $P$ -value  $< 10^{-3}$ ). The next three plots show the variation in differentiation indexes  $F_{ST}$  and  $F_{STB}$  and the overall diversity  $H_T$  calculated for 242 non-admixed lines (assignment to one group  $> 0.8$ ).  $F_{ST}$  corresponds to differentiation using r-Hierfstat [46].  $F_{ST}$  and  $H_T$  were averaged over a sliding window of 1 Mb moving along the chromosomes by steps of 500 kb.  $F_{STB}$  corresponds to differentiation calculated with BayeScan [47]. Finally, the last graph displays pairwise LD ( $r^2 > 0.2$ ) estimated with Plink [50], presented as a triangle plot.

Chr 1

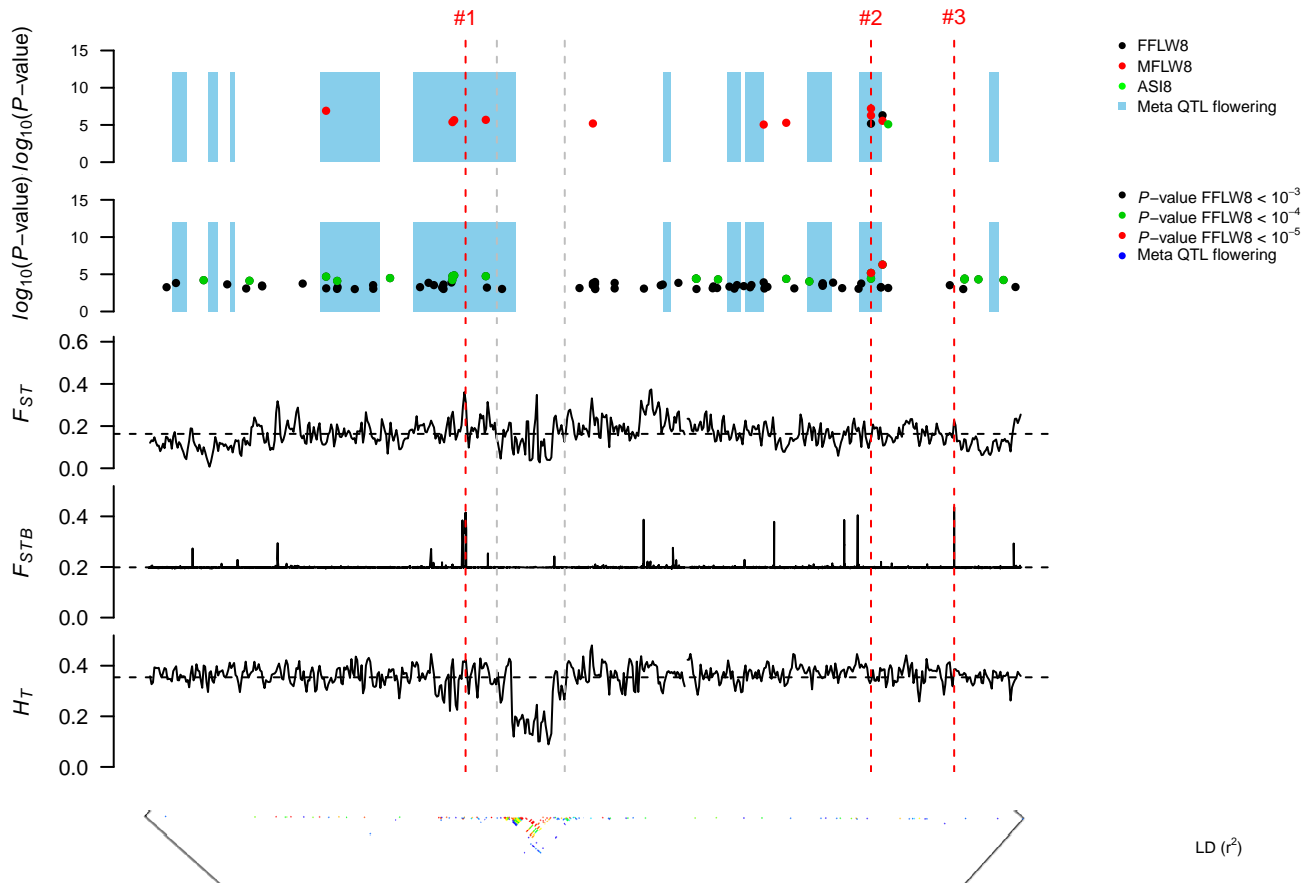

# Chr 2

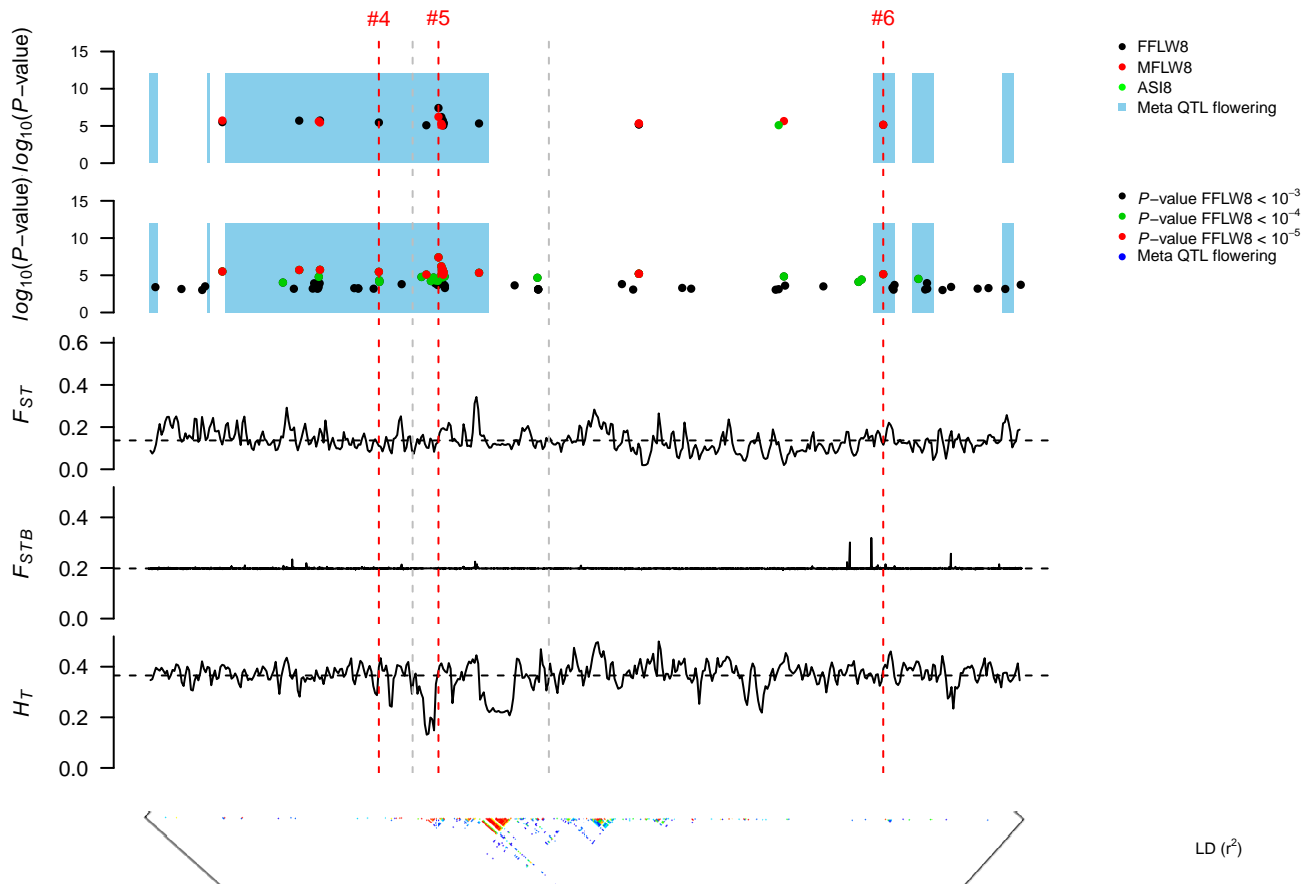

# Chr 3

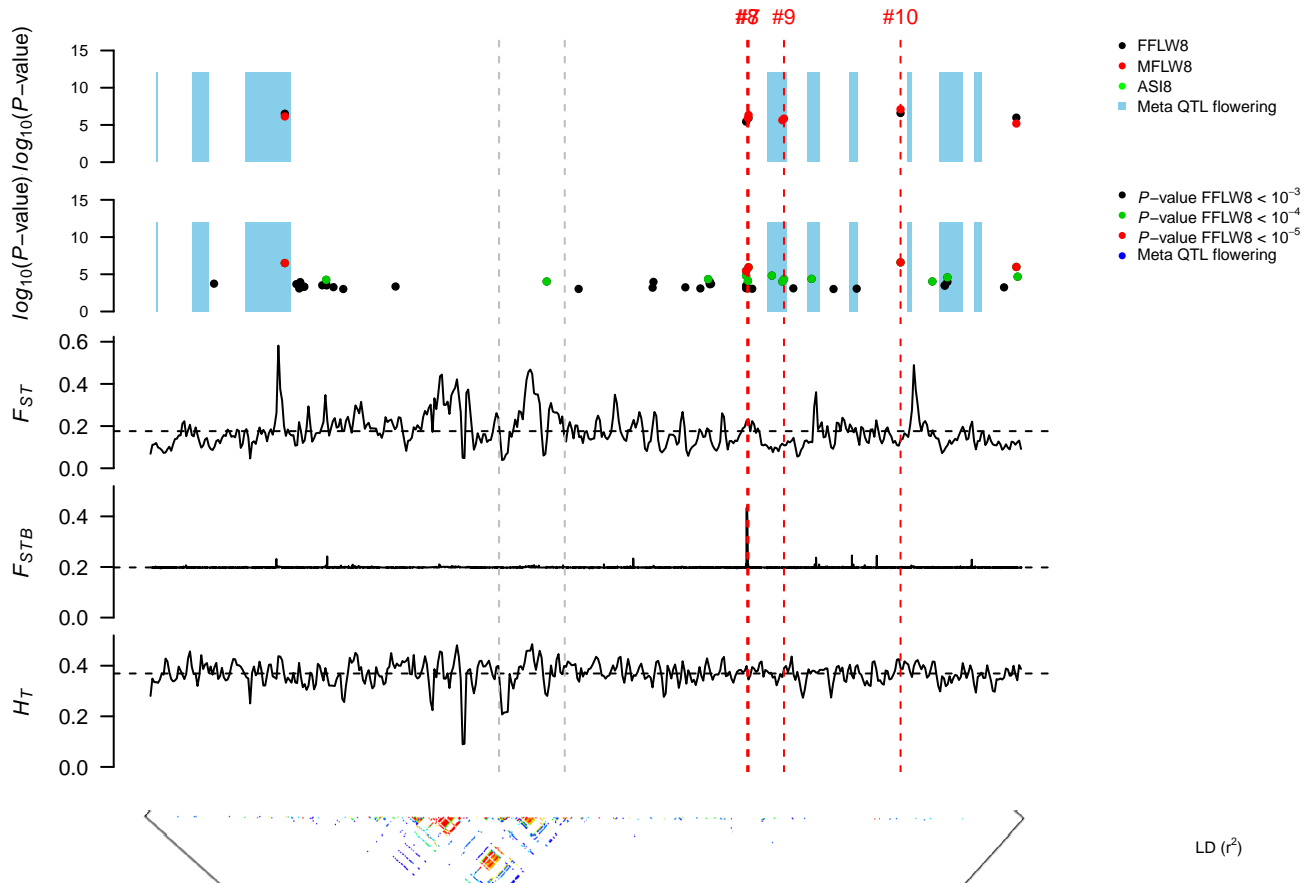

# Chr 4

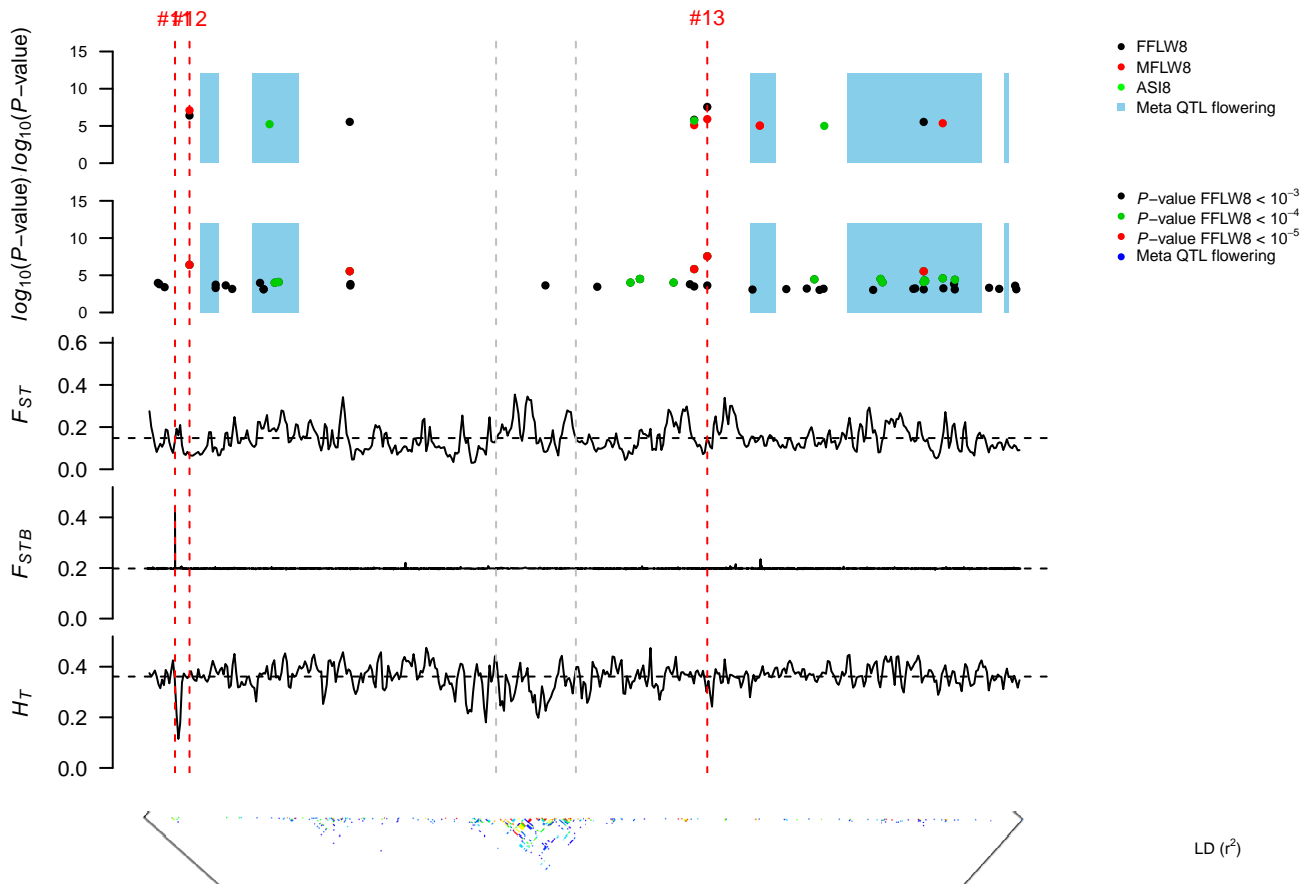

# Chr 5

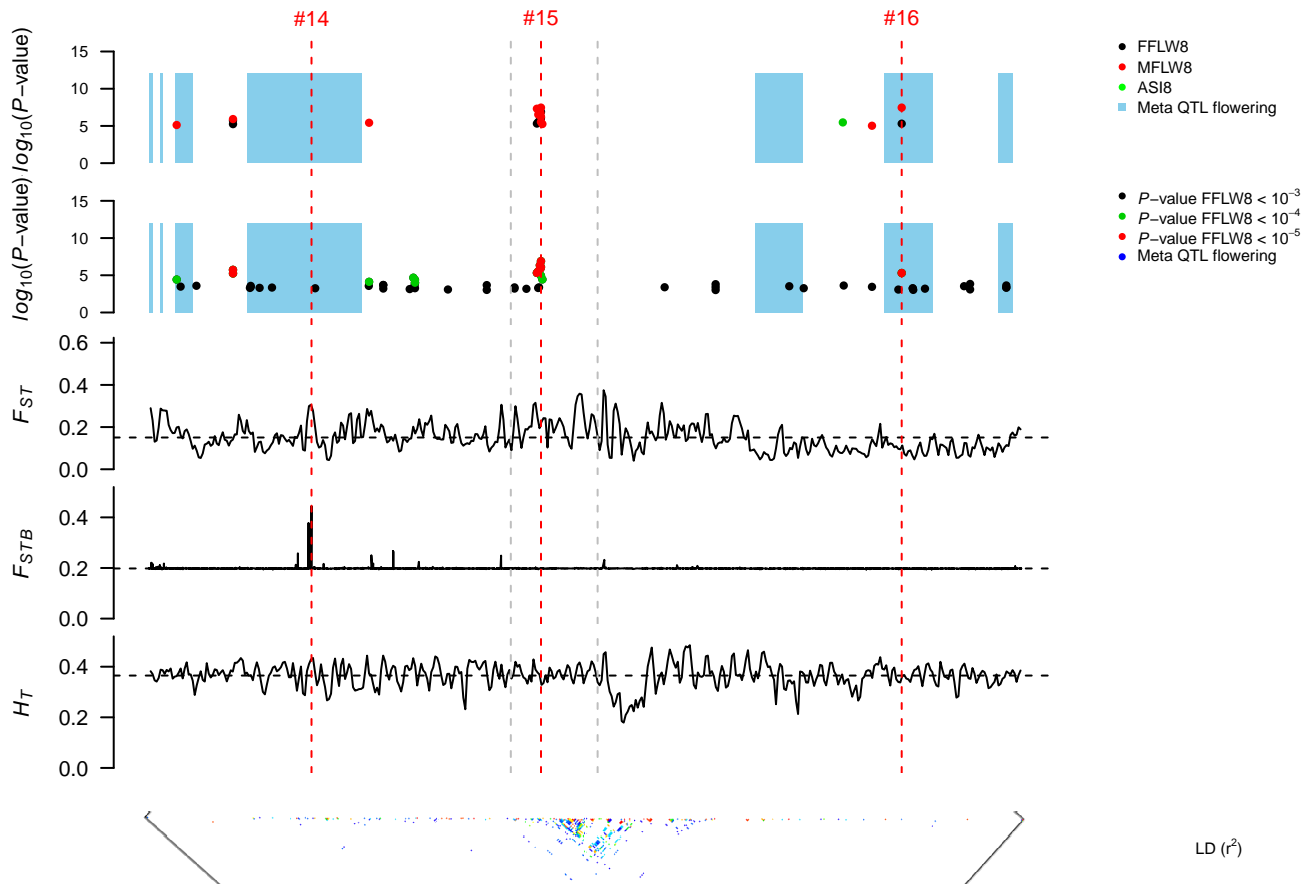

# Chr 6

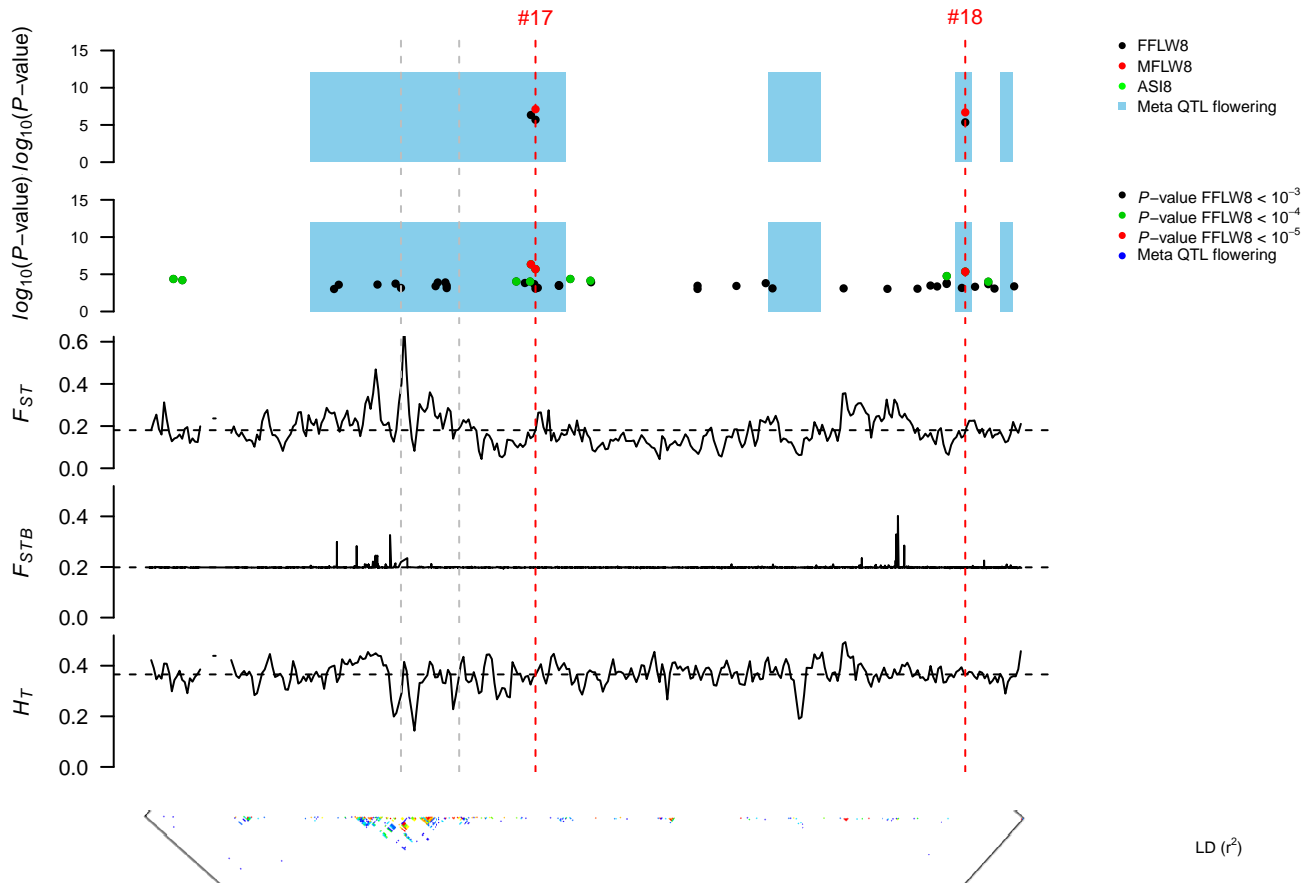

# Chr 7

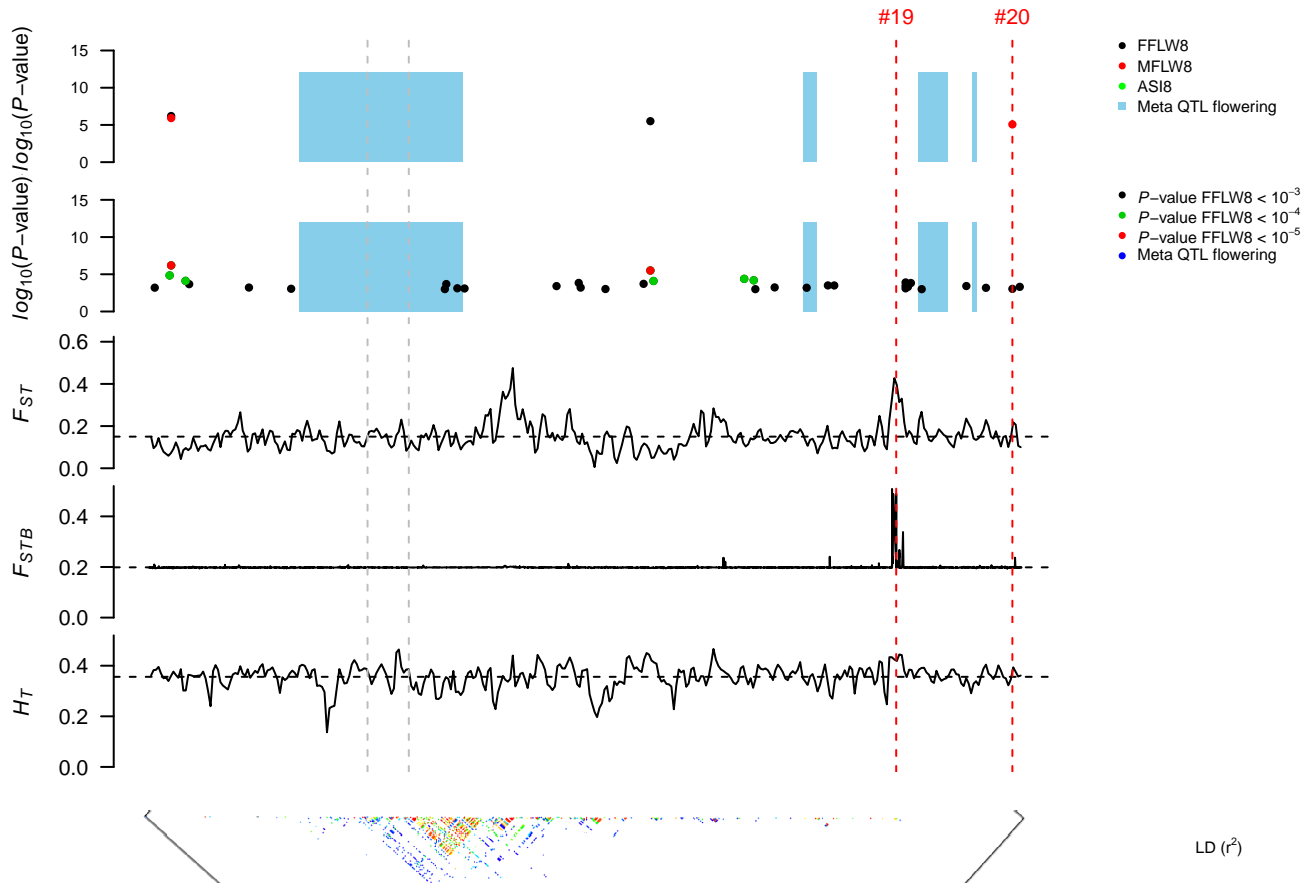



# Chr 8

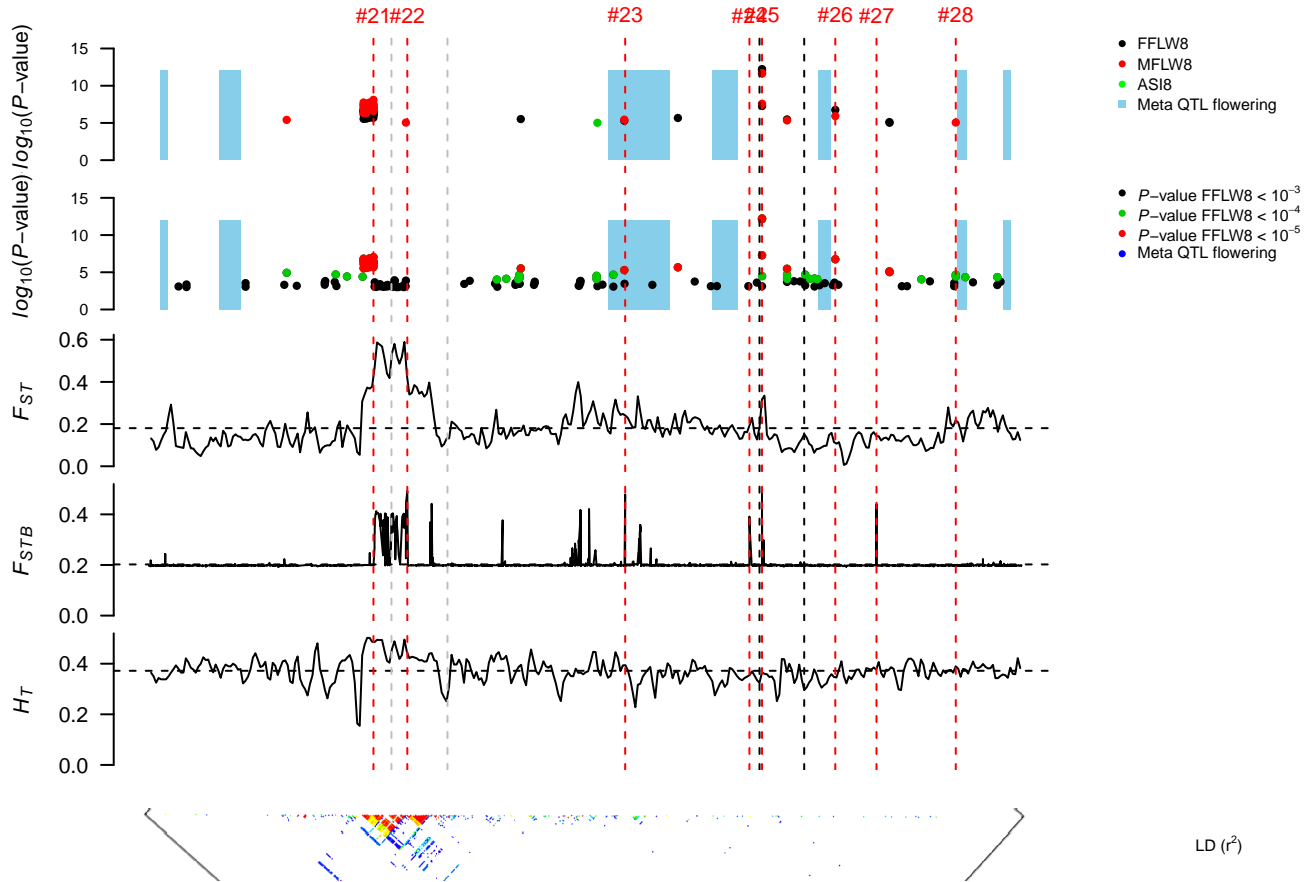

# Chr 9

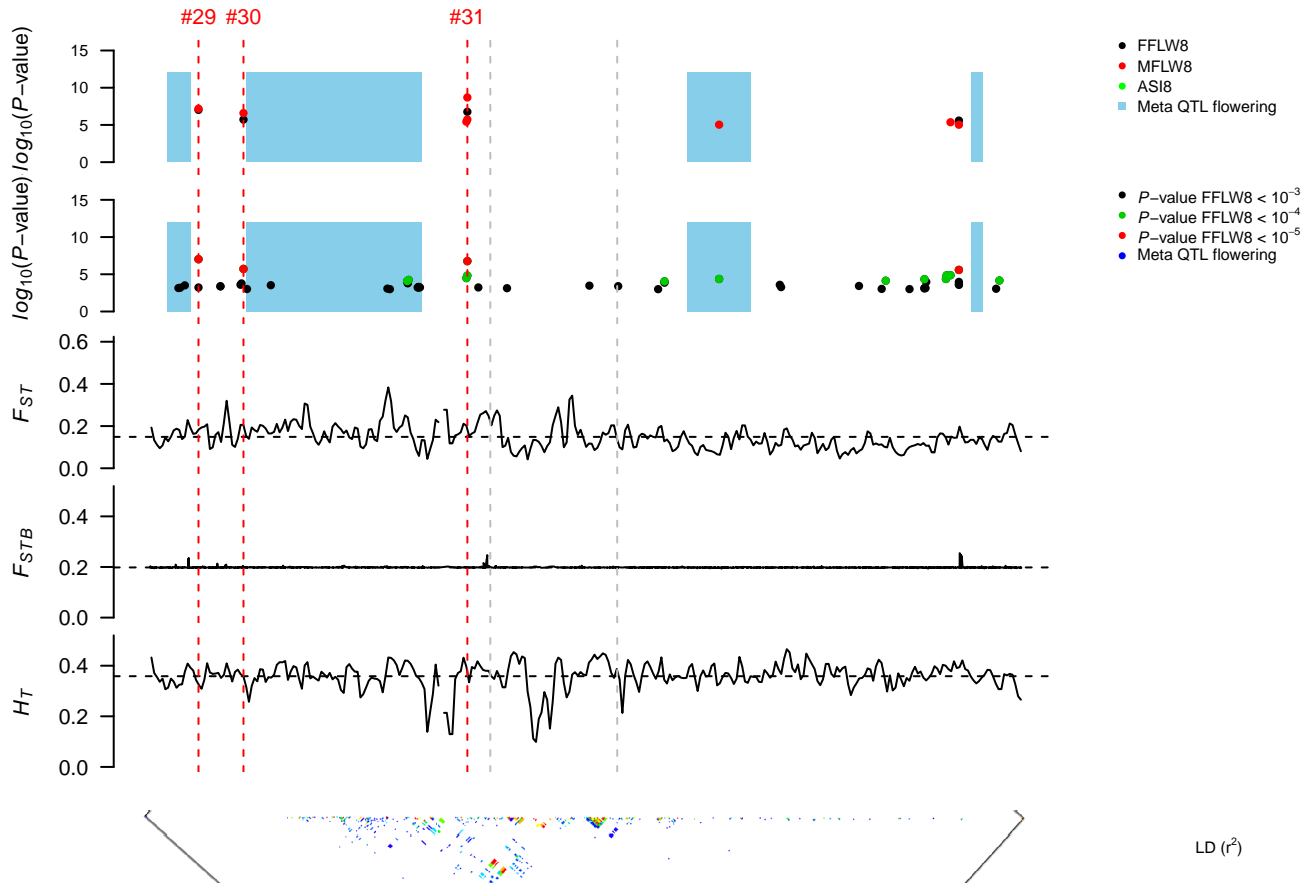

# Chr 10

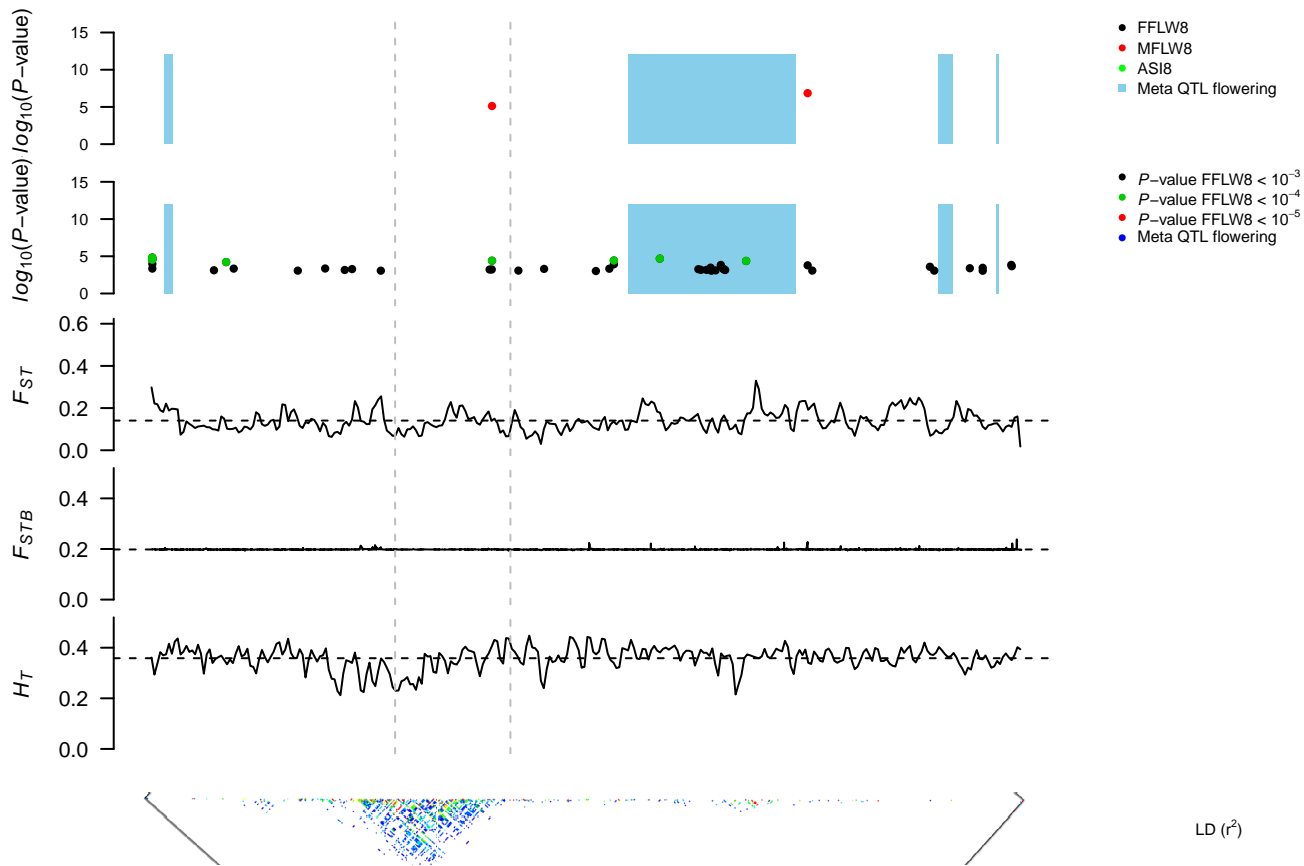

Supplement: S3 (10.1371/journal.pone.0071377.s003) [file journal.pone.0071377.s003]
